# Supplementary material for: Synthesis of para-sulfonatocalix[4]arene-modified silver nanoparticles as colorimetric histidine probes
Source: Royal Society of Chemistry journal article supplement (doi:10.1039/b716270g), 2007-12-18
Supplement: b716270g.pdf [file b716270g.pdf]

## Synthesis of *p*-sulfonatocalix[4]arene modified silver nanoparticles as colorimetric histidine probes

Dejun Xiong, Mingliang Chen and Haibing Li\*

*Key Laboratory of Pesticide and Chemical Biology (CCNU), Ministry of Education, College of Chemistry, Central China Normal University, Wuhan 430079, PR China*

E-mail: lhbing@mail.ccnu.edu.cn

### Experimental details

Synthesis of *p*-sulfonatocalix[4]arene: The procedure according to Shinkai's method<sup>1-3</sup> was slightly modified as follows. Calix[4]arene (1g) was mixed with 10 mL of concentrated H<sub>2</sub>SO<sub>4</sub>. Then the solution was heated at 70 °C for 3h. An aliquot was withdrawn from the solution and poured into water to determine the progress of the reaction. The reaction was completed when water-insoluble material was not detected. After cooling, the precipitate was recovered by filtration. The precipitate was dissolved in 4 mL water before addition of 20 mL brine. Finally, 1.3 g *p*-sulfonatocalix[4]arene was obtained after evaporation of water in yield of 66.3%; Single spot on paper chromatography (water-2-propanol 1:1 v/v); IR (KBr)  $\nu_{\text{OH}}$  3431, 3188 cm<sup>-1</sup>,  $\nu_{\text{SO}_3}$  1187, 1049 cm<sup>-1</sup>; <sup>1</sup>H NMR (D<sub>2</sub>O)  $\delta$ (ppm): 3.45, 4.25 (d, 8H, ArCH<sub>2</sub>Ar), 7.93 (Ar H, s, 8H).

### Synthesis of *p*-sulfonatocalix[4]arene modified silver nanoparticles

2 mL of 10<sup>-2</sup> M AgNO<sub>3</sub> solution was added to 96 mL of triply distilled water. To this solution, 2 mL of 10<sup>-2</sup> M *p*-sulfonatocalix[4]arene aqueous solution was added as stabilizer with stirring for 20 min. And then, 8.8 mg of NaBH<sub>4</sub> was added to the

solution. The mixture was continually stirred for 5 min at room temperature. The silver colloids were finally obtained.

### **Synthesis of mercaptoacetic acid modified silver nanoparticles**

To the solution of 2 mL of  $10^{-2}$  M  $\text{AgNO}_3$  solution and 96 mL of triply distilled water, 8.8 mg of  $\text{NaBH}_4$  was added. And then, 2 mL of  $10^{-2}$  M mercaptoacetic acid aqueous solution was added as stabilizer with stirring for 7 hours at room temperature.

### **The stability of $p\text{SC}_4\text{-Ag}$ NPs and MA-Ag NPs**

Fig. S1 shows the adsorption spectra of  $p\text{SC}_4\text{-Ag}$  NPs and MA-Ag NPs recorded on different times. For  $p\text{SC}_4\text{-Ag}$  NPs, there was no obvious change in the shape, position and symmetry of the absorption peak during the initial one month, except for a little decrease of the absorbance intensity. However, for MA-Ag NPs, it is shown that the obvious change in the shape, position and symmetry of the absorption peak and the dramatical decrease of the absorbance intensity. The results indicate  $p\text{SC}_4\text{-Ag}$  NPs are more stable than MA-Ag NPs.

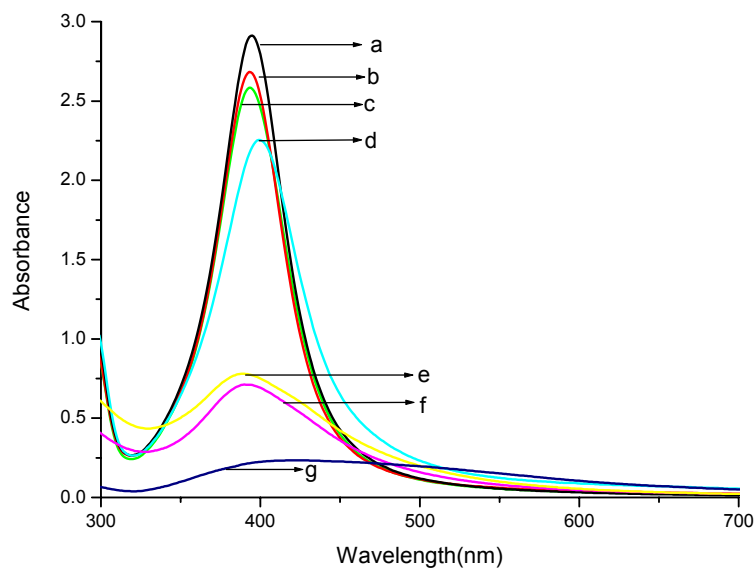

Fig.S1 The absorption spectra of  $pSC_4$ -AgNPs recorded at: (a) 0, (b) 48 h, (c) 120 h, (d) 720 h (one month) and MA-Ag NPs recorded at: (e) 0 (f) 24 h (g) 240 h

## References

- 1 S. Shinkai, S. Mori, H. Koreishi, T. Tsubaki and O. Manabe, *J. Am. Chem. Soc.*, 1986, **108**, 2409
- 2 S. Shinkai, K. Araki, T. Tsubaki, T. Arimura and O. Manabe, *J. Chem. Soc. Perkin Trans. I*, 1987, 2297.
